# Supplementary material for: An electrochemical sensor based on reduced graphene oxide decorated with polypyrrole nanofibers and zinc oxide–copper oxide p–n junction heterostructures for the simultaneous voltammetric determination of ascorbic acid, dopamine, paracetamol, and tryptophan
Source: Royal Society of Chemistry journal article supplement (doi:10.1039/c8nj00857d), 2018-01-01
Supplement: c8nj00857d1.pdf [file c8nj00857d1.pdf]

**An electrochemical sensor based on reduced graphene oxide decorated with polypyrrole nanofiber and Zinc oxide-copper oxide p-n junction heterostructures for the simultaneous voltammetric determination of Ascorbic acid, Dopamine, Paracetamol, and Tryptophan**

Kh. Ghanbari,<sup>\* ,a</sup> S. Bonyadi<sup>a</sup>

The effect of pH on the electrochemistry of 500  $\mu$ M AA, DA, PAR, and TRP at  $\text{Cu}_x\text{O}$ -ZnO /PPy/RGO/GCE was also performed by CV from pH 4.0 to 9.0 in PBS. As shown in Fig

---

<sup>a, \*</sup> Department of Chemistry, Faculty of physics and chemistry, School of Science, Alzahra University, Vanak, Tehran 1993891167, Iran. e-mail: [kh\\_ghanb@yahoo.com](mailto:kh_ghanb@yahoo.com) ([kh.ghanbari@alzahra.ac.ir](mailto:kh.ghanbari@alzahra.ac.ir)).

S1, the oxidation peak potential of the CV curves with increasing the pH shifts negatively. The linear relationship between the pH and the oxidation peak potentials of AA, DA, PAR, and TRP vary linearly with pH as follows:

$$E_{pa} \text{ versus Ag/AgCl (V)} = 0.3633 - 0.0524 \text{ pH} \quad (R^2 = 0.9901) \quad (\text{AA})$$

$$E_{pa} \text{ versus Ag/AgCl (V)} = 0.5308 - 0.0576 \text{ pH} \quad (R^2 = 0.9902) \quad (\text{DA})$$

$$E_{pa} \text{ versus Ag/AgCl (V)} = 0.8786 - 0.0599 \text{ pH} \quad (R^2 = 0.9937) \quad (\text{PAR})$$

$$E_{pa} \text{ versus Ag/AgCl (V)} = 1.0635 - 0.0527 \text{ pH} \quad (R^2 = 0.9961) \quad (\text{TRP})$$

By considering the Nernst equation,

$$dE_p = dpH = -2.303 \text{ mRT/nF}$$

The parameters of m and n are the number of protons and electrons involved in the reaction, respectively. The values of m/n are 0.89, 0.97, 1.01, and 0.89, for AA, DA, PAR, and TRP, respectively, which are approximately equal to 1, indicating that equal numbers of protons and electrons are involved during the electrochemical oxidation process. Based on the m/n values and Nernstian values for the oxidation of AA, DA, PAR, and TRP, one can conclude that two electrons and two protons are involved during the electrochemical oxidation of AA, DA, PAR, and TRP. Also, the peaks current of AA, DA, PAR, and TRP increases as the pH changes from 4.0 to 7.0 and decreases in the alkaline environment of pH 8.0 and 9.0 (Fig. S1). Finally, the pH 7.0 was chosen as the optimized pH value in the present work. In addition, the pH of human blood is about this pH, suggesting that the proposed  $\text{Cu}_x\text{O-ZnO/PPy/RGO/GCE}$  is quite suitable for the practical measurements.

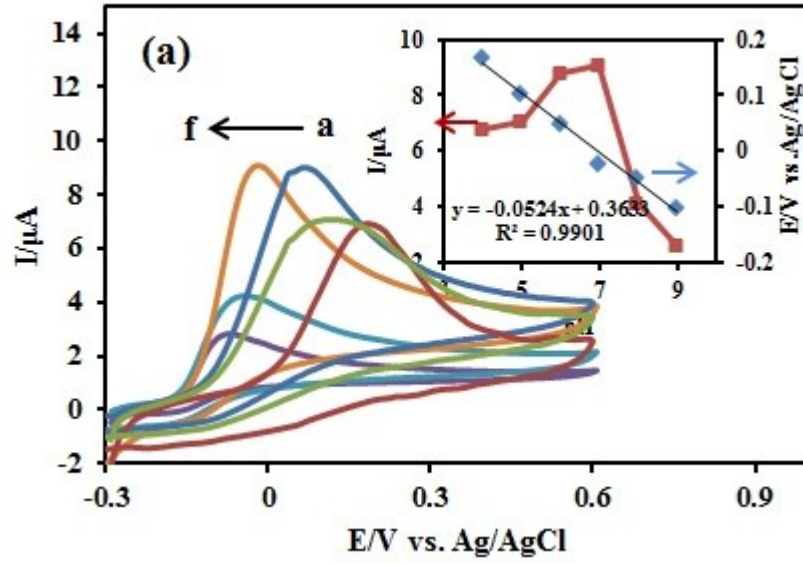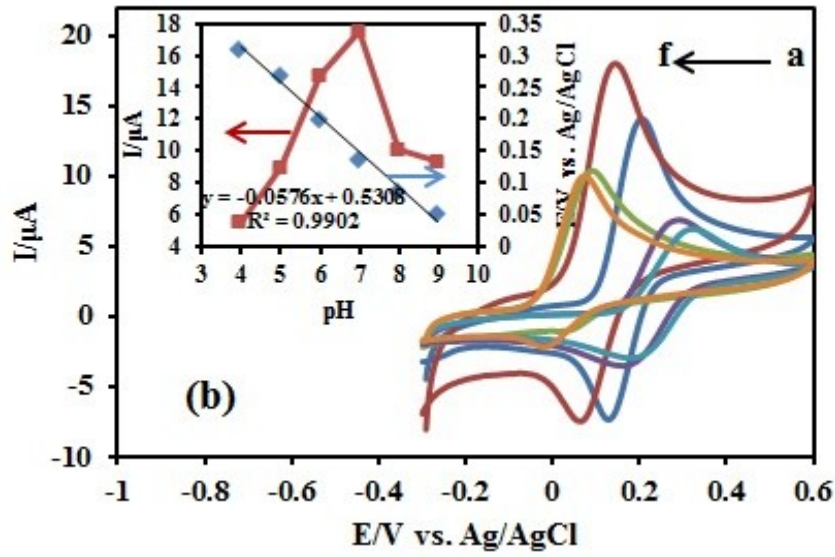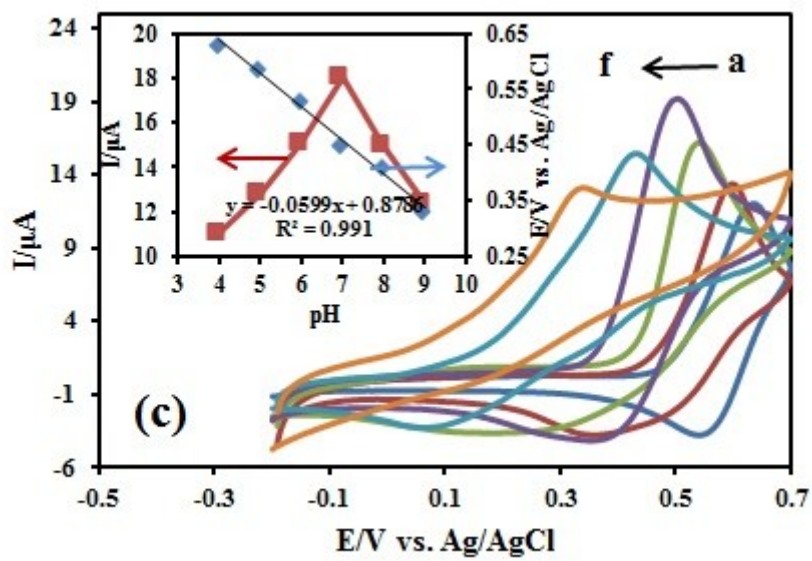

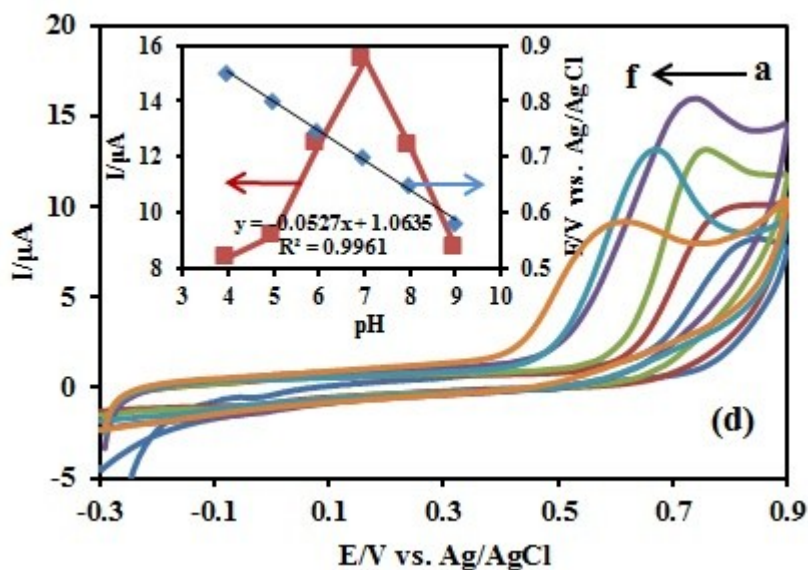

Fig. S1. Cyclic voltammograms of the 500  $\mu\text{M}$  AA (a), DA (b), PAR (c), and TRP (d) at the 3DCu<sub>x</sub>O-ZnO/PPy/RGO/GCE in the range of pH 4.0-9.0 (a to f) respectively, at a scan rate of 100  $\text{mV s}^{-1}$ . Inset: Dependence of peak current and peak potential on pH.

Differential pulse voltammetry (DPV), because of its good resolution and higher sensitivity, was employed for individual determination of AA (a), DA (b), PAR (c), and TRP (d) and PB (b) on the modified electrode (Fig. S2). The linear relationship exhibited between the peak currents and the concentrations of AA, DA, PAR, and TRP in the ranges of 0.08–475, 0.04–420, 0.033-400, and 0.053–480  $\mu\text{M}$ , with the detection limits of 0.024, 0.012, 0.010, and 0.016  $\mu\text{M}$  ( $S/N = 3$ ), respectively. The linear relation could be expressed by regression equation of  $I_{p\text{ AA}} = 0.0196 C_{\text{AA}} - 0.4629$  ( $R^2 = 0.9921$ ),  $I_{p\text{ DA}} = 0.039 C_{\text{DA}} - 0.2718$  ( $R^2 =$

0.9901),  $I_{p\text{ PAR}} = 0.0444 C_{\text{PAR}} + 0.4663$  ( $R^2 = 0.9955$ ), and  $I_{p\text{ TRP}} = 0.0306 C_{\text{TRP}} + 1.7269$  ( $R^2 = 0.9904$ ), respectively.

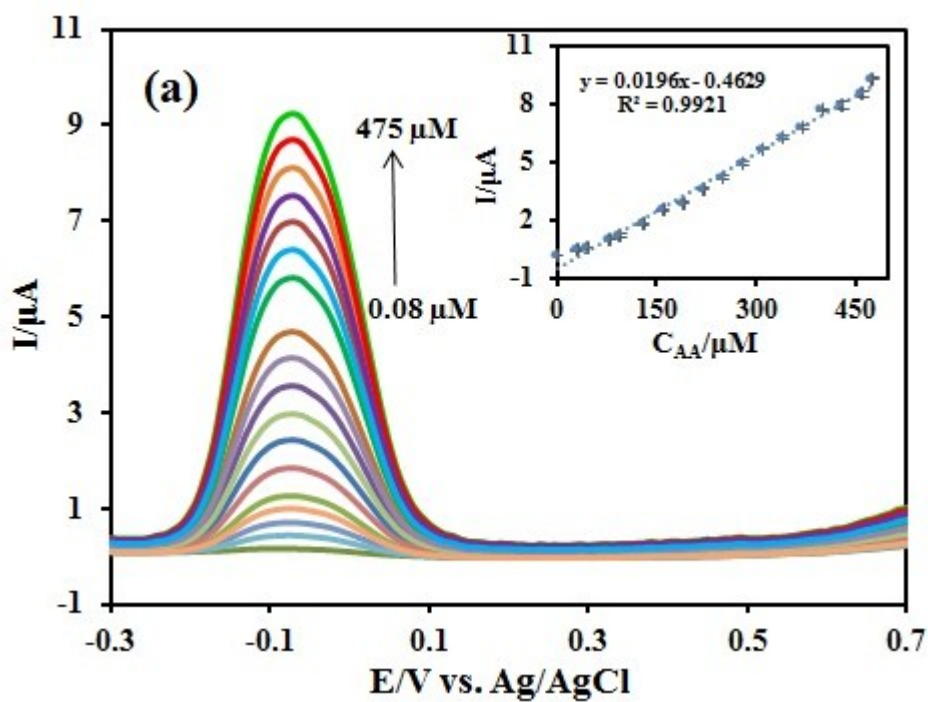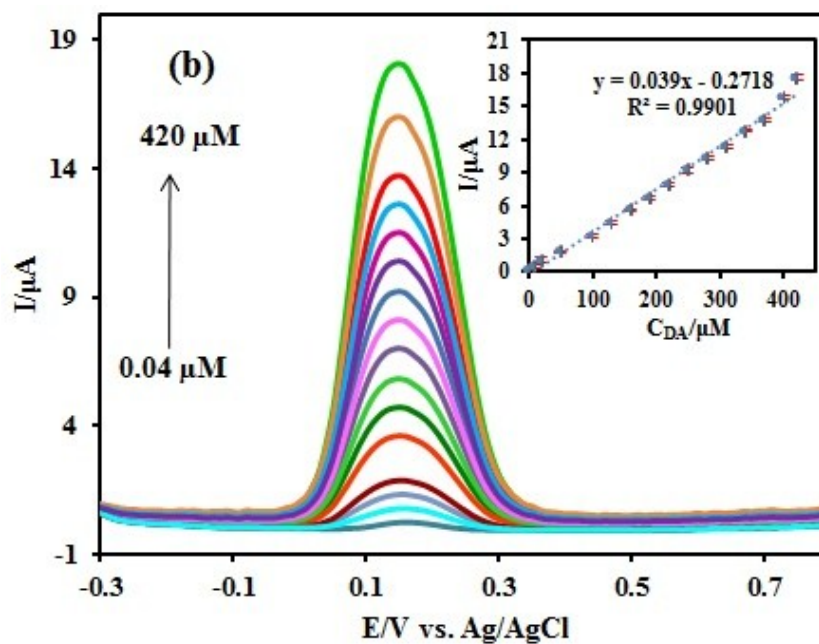

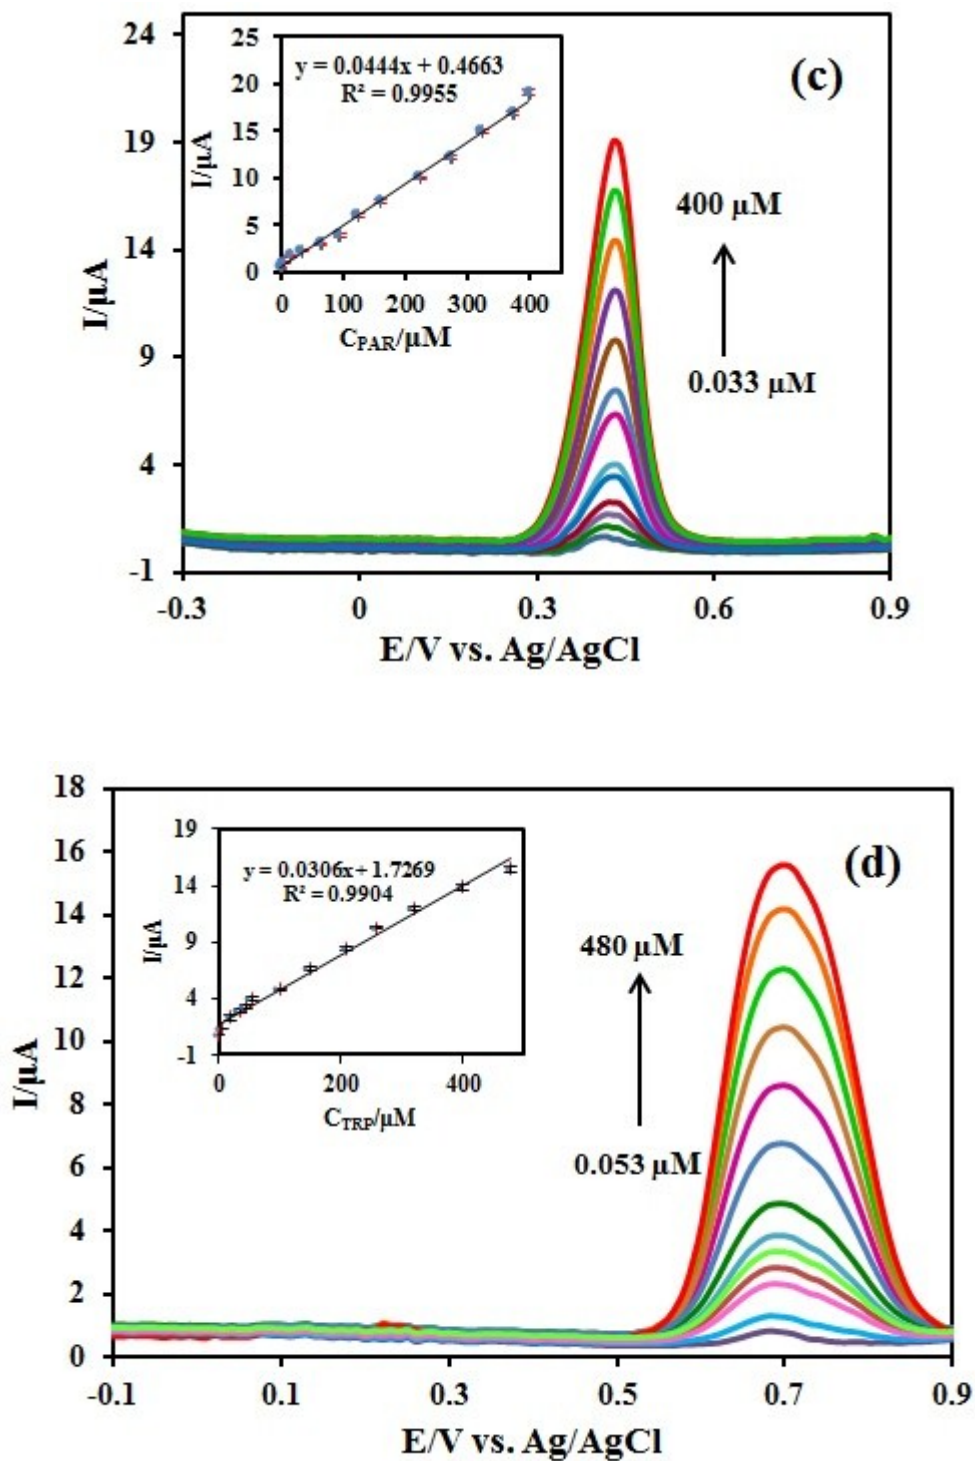

Fig. S2. DPVs of (a) different concentrations of AA (0.08–475.0  $\mu\text{M}$ ); (b) different concentrations of DA (0.04–420.0  $\mu\text{M}$ ); (c) different concentrations of PAR (0.033–400  $\mu\text{M}$ ); (d) different concentrations of TRP (0.053–480.0  $\mu\text{M}$ ). DPV experimental conditions: pulse amplitude of 50 mV, pulse time of 100 ms, sweep rate of 50  $\text{mV s}^{-1}$ ;

in 0.1 M PBS solution (pH 7.0). Error bars indicate the standard deviations of three repeated measurements.

DPV was used to investigate the possibility of using the 3DCu<sub>x</sub>O-ZnO/PPy/RGO nanocomposite for simultaneous determination of AA, DA, PAR, and TRP. The DPVs in Fig. S3 (a-d) show the non-interfered change in the peak current response to oxidation of each individual species as its concentration changed in the presence of fixed amounts of the other three species. The insets show the current responses of all four species increasing linearly with their corresponding concentration. The linear regression equations were  $I_{pa} = 0.0201C_{AA} - 0.4937$  ( $R^2 = 0.9926$ ),  $I_{pa} = 0.04C_{DA} - 0.5833$  ( $R^2 = 0.9912$ ),  $I_{pa} = 0.0489C_{PAR} - 0.4823$  ( $R^2 = 0.9956$ ) and  $I_{pa} = 0.0297C_{TRP} + 2.1325$  ( $R^2 = 0.9911$ ), and the linear concentration ranges were 0.08-475  $\mu$ M, 0.04-420  $\mu$ M, 0.033-400  $\mu$ M, and 0.053-480  $\mu$ M with detection limits (S/N = 3) of 0.024  $\mu$ M, 0.012  $\mu$ M, 0.010  $\mu$ M, and 0.016  $\mu$ M, for AA, DA, PAR, and TRP, respectively. These results indicate that the proposed method can be used for selective determination of the three species.

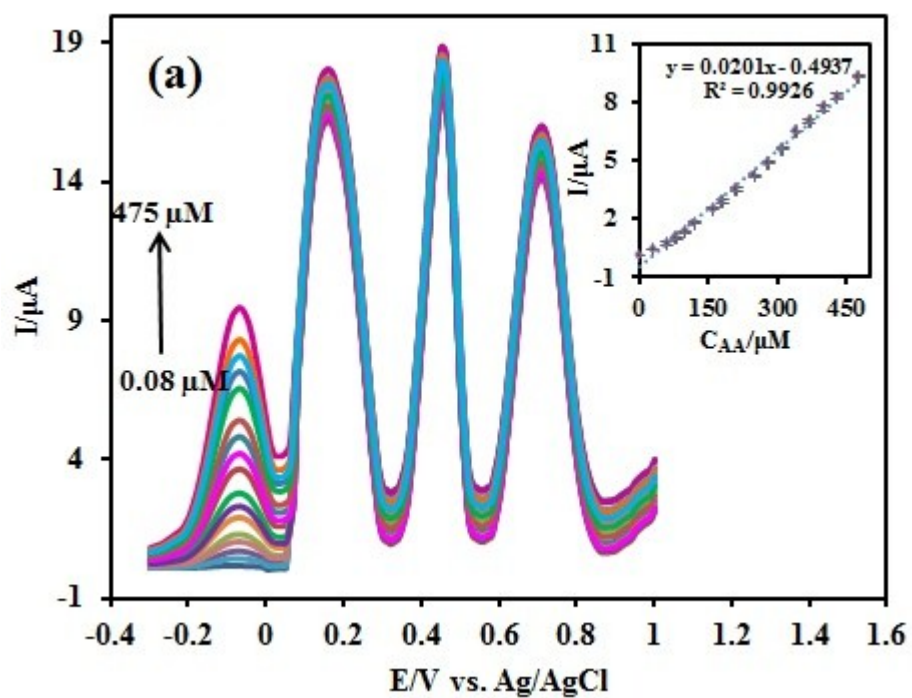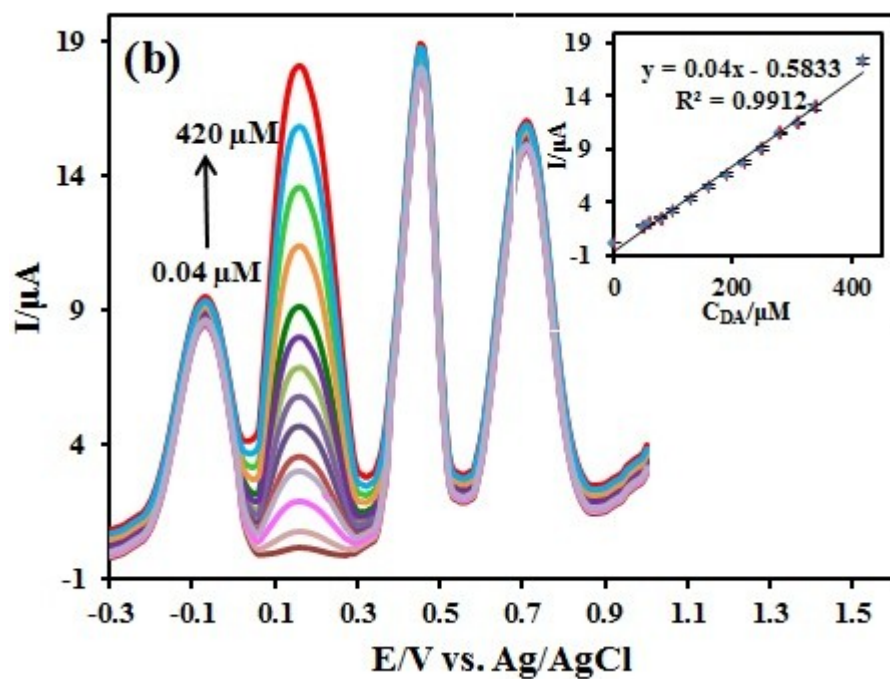



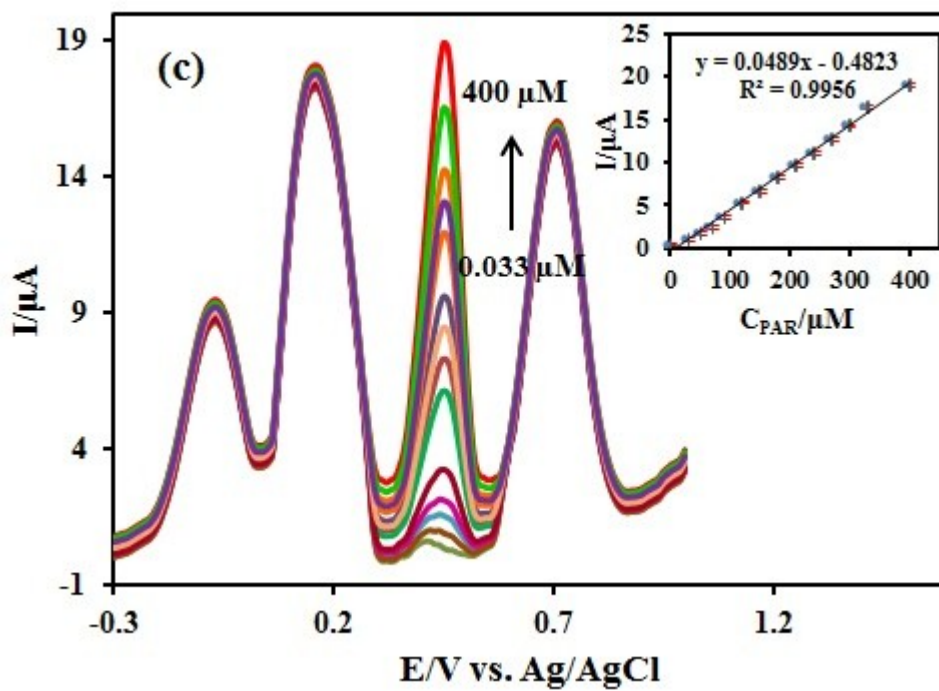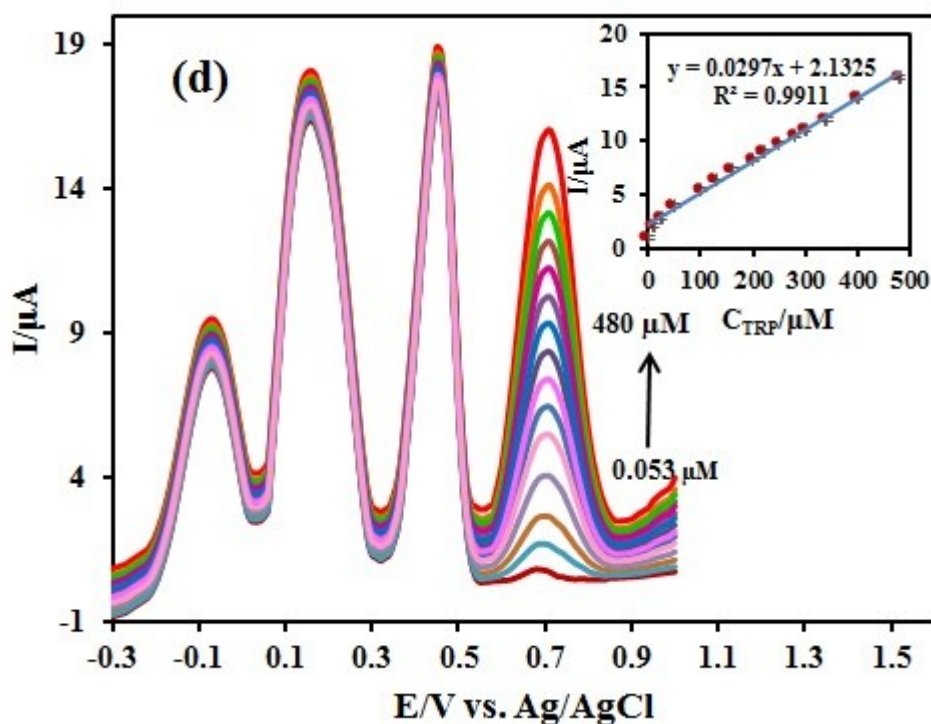

Fig. S3. . DPVs of (a) different concentrations of AA (0.08–475.0 μM) in the presence of 500.0 μM of DA, PAR, and TRP; (b) different concentrations of DA (0.04–420.0 μM) in the presence of 500 μM of AA, PAR, and TRP; (c) different concentrations of PAR (0.033–400.0 μM) in the presence of 500.0 Mm of AA, DA, and TRP; (d) different concentrations of TRP (0.053–

480.0  $\mu\text{M}$ ) in the presence of 500.0 Mm of AA, DA, and PAR. DPV experimental conditions: pulse amplitude of 50 mV, pulse time of 100 ms, sweep rate of 50  $\text{mV s}^{-1}$ ; in 0.1 M PBS solution (pH 7.0). Error bars indicate the standard deviations of three repeated measurements.

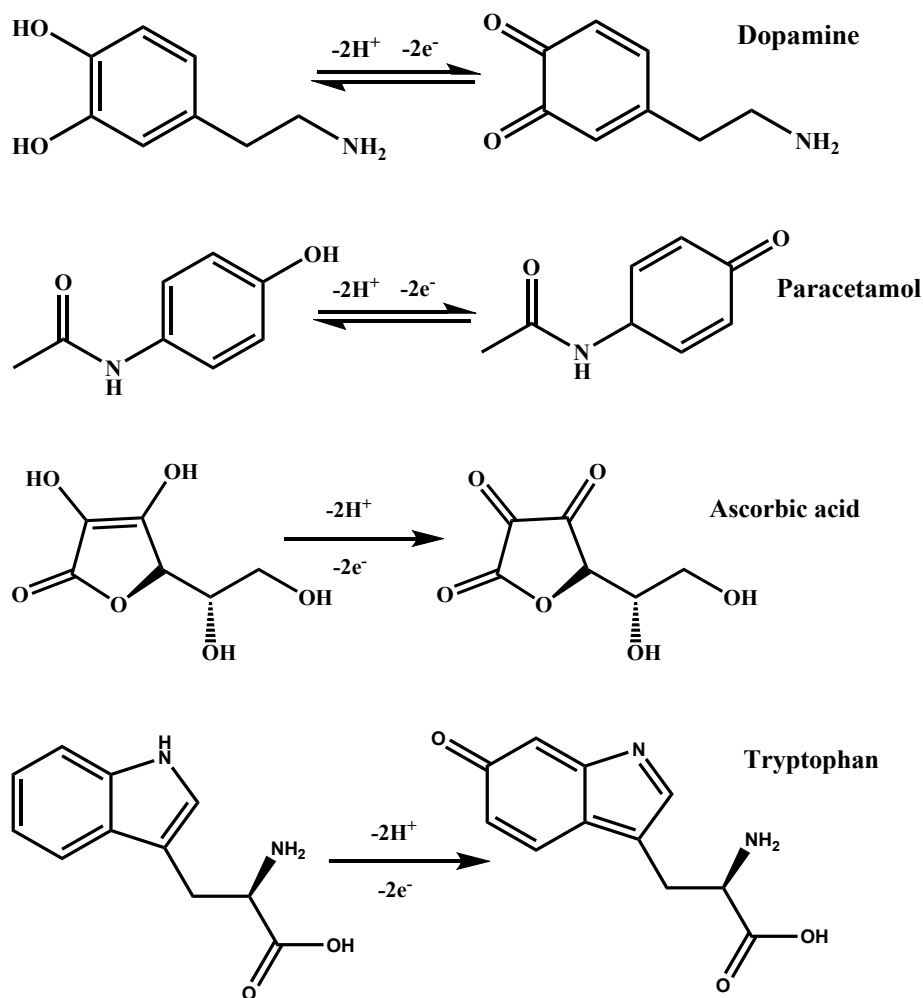

**Fig.S4:** Electrochemical Oxidation of AA, DA, PAR, and TRP.

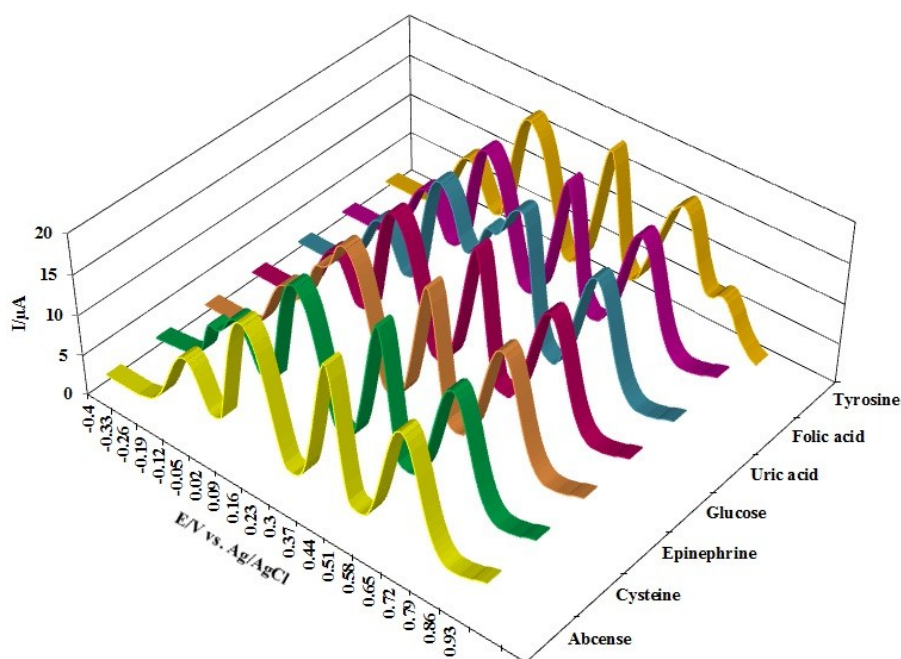

**Fig. S5:** Interference test of the 3DCu<sub>x</sub>O-ZnO/PPy/RGO/GCE in 0.1 M phosphate buffer solution (pH 7.0) containing 500 μM of AA, DA, PAR, and TRP, and other interferences as indicated.

**Table S1:** Effect of various interferences on the AA, DA, PAR, and TRP sensing response of 3DCu<sub>x</sub>O-ZnO/PPy/RGO/GCE.

| Interferences     | Average of I <sub>p</sub> (μA) |       |       |       | %E(±) |      |      |      | %RSD |      |      |      |
|-------------------|--------------------------------|-------|-------|-------|-------|------|------|------|------|------|------|------|
|                   | AA                             | DA    | PAR   | TRP   | AA    | DA   | PAR  | TRP  | AA   | DA   | PAR  | TRP  |
| Cysteine (500)    | 9.60                           | 18.12 | 19.07 | 16.13 | 1.91  | 0.78 | 0.37 | 0.50 | 1.06 | 0.16 | 0.80 | 0.95 |
| Epinephrine (500) | 9.50                           | 18.48 | 19.12 | 16.29 | 0.84  | 2.78 | 0.63 | 1.49 | 1.06 | 0.42 | 0.66 | 1.14 |
| Glucose (500)     | 9.47                           | 18.28 | 19.40 | 16.27 | 0.53  | 1.67 | 2.11 | 1.37 | 1.62 | 0.42 | 0.18 | 0.68 |
| Uric acid (500)   | 9.39                           | 18.08 | 19.33 | 16.18 | 0.32  | 0.56 | 1.74 | 0.81 | 0.84 | 0.42 | 1.32 | 0.47 |
| Folic acid (500)  | 9.36                           | 17.98 | 19.10 | 17.17 | 0.64  | 0    | 0.53 | 6.96 | 0.96 | 0.42 | 0.53 | 0.95 |
| Tyrosine (500)    | 9.41                           | 17.88 | 19.15 | 16.37 | 0.11  | 0.56 | 0.79 | 1.99 | 0.96 | 0.42 | 0.79 | 0.95 |
| Interference free |                                |       |       |       |       |      |      |      |      |      |      |      |
| Average           | 9.42                           | 17.98 | 19.00 | 16.05 |       |      |      |      |      |      |      |      |
